# Supplementary material
Source: publisher site journal article supplement (http://dictionary.cambridge.org/assets/bilingual/spanish/supplement.pdf)
Supplement: Supplementary file 1 [file supplement.pdf]

**Apéndice I****Correspondencia privada ..... 548**

|                                                                   |     |
|-------------------------------------------------------------------|-----|
| A la oficina de turismo: solicitud de folletos informativos ..... | 548 |
| Reservar una habitación de hotel .....                            | 550 |
| Pedir información sobre un apartamento para las vacaciones .....  | 551 |
| Alquilar un apartamento para las vacaciones .....                 | 552 |
| Carta desde el lugar de vacaciones .....                          | 553 |
| Felicitación de Navidad (registro informal) .....                 | 554 |
| Felicitación de Navidad (registro formal) ..                      | 555 |
| Felicitación de cumpleaños .....                                  | 556 |
| Tarjeta de pésame .....                                           | 557 |
| Invitación .....                                                  | 558 |
| Aceptar una invitación .....                                      | 559 |
| Rechazar una invitación .....                                     | 560 |
| Agradecer a alguien su hospitalidad .....                         | 562 |
| Anuncio de boda .....                                             | 564 |
| Invitación de boda .....                                          | 565 |
| Aceptar la invitación a una boda .....                            | 566 |
| Agradecer un regalo de bodas .....                                | 568 |
| Agradecer un regalo de cumpleaños .....                           | 569 |

**Correspondencia comercial ..... 570**

|                                            |     |
|--------------------------------------------|-----|
| Carta de pedido .....                      | 570 |
| Acusar recibo de pedido .....              | 572 |
| Carta de reclamación .....                 | 574 |
| Carta de solicitud de empleo .....         | 576 |
| Carta de solicitud de empleo al azar ..... | 578 |
| Curriculum vitae .....                     | 580 |

**Fórmulas útiles para la correspondencia ..... 582****Expresiones útiles ..... 584****Supplement I****Private correspondence ..... 548**

|                                               |     |
|-----------------------------------------------|-----|
| Tourist office: asking for information .....  | 549 |
| Booking a room in a hotel .....               | 550 |
| Information about a holiday apartment .....   | 551 |
| Booking a holiday apartment .....             | 552 |
| Holiday postcard .....                        | 553 |
| Christmas Greetings (informal register) ..... | 554 |
| Christmas Greetings (formal register) .....   | 555 |
| Birthday card .....                           | 556 |
| Condolences .....                             | 557 |
| Invitation .....                              | 558 |
| Accepting an invitation .....                 | 559 |
| Turning down an invitation .....              | 561 |
| Thanks after staying in someone's home ...    | 563 |
| Marriage announcement .....                   | 564 |
| Wedding invitation .....                      | 565 |
| Acceptance of a wedding invitation .....      | 567 |
| Thanks for a wedding gift .....               | 568 |
| Thanks for a birthday present .....           | 569 |

**Business correspondence ..... 570**

|                                      |     |
|--------------------------------------|-----|
| Ordering .....                       | 571 |
| Confirming receipt of an order ..... | 573 |
| Complaint .....                      | 575 |
| Application letter .....             | 576 |
| Unsolicited application letter ..... | 579 |
| Curriculum vitae .....               | 581 |

**Useful expressions in letters ..... 582****Useful phrases ..... 584**

## Correspondencia privada Private correspondence

### A la oficina de turismo: solicitud de folletos informativos

Sr. Silvinio Pérez  
Pza. Padre Silverio, 35  
09001 Burgos

Dirección General de Turismo de Tarragona  
Rambla Nova, 46  
43004 Tarragona

Burgos, a 13 de febrero de 2002

Distinguidos señores:

Me gustaría pasar las vacaciones con mi familia en agosto en la costa de Tarragona. Por este motivo les agradecería que fueran tan amables de enviarme prospectos de los lugares turísticos y de los hoteles de esta zona.

Sin otro particular y agradeciéndoles por adelantado su respuesta, les saluda atentamente,

*Silvinio Pérez*

Me gustaría pasar las vacaciones en...  
enviarme prospectos

*I wish to spend my holidays in ...  
send me details*

*Note: Spanish writers put both their name and address at the top left of the page, with the name and address of the other person below and to the left.*

**Tourist office: asking for information**

65 Rogers Road,  
Rickland  
GN8 4BY

2 February 2002

England Tourist Board  
New Park  
Southbridge  
Kent  
XP1 7TU

Dear Sirs,

My family and I wish to spend our holidays in the South-East during July.

Could you kindly send me details of places of interest and hotels.

With thanks,

Yours faithfully,

*John Roberts*

*¡Atención! En una carta inglesa el nombre no suele aparecer en el membrete. La dirección del remitente se pone arriba a la derecha, la dirección del destinatario a la izquierda.*

**Reservar una habitación de hotel**

Distinguidos señores:

Les agradezco las molestias que se han tomado al enviarme folletos informativos sobre las condiciones de estancia en su hotel.

Les agradecería que reservaran para mi señora, para mí mismo y nuestros dos hijos dos habitaciones dobles con ducha, una con dos camas y la otra con una de matrimonio, en régimen de media pensión del 2 al 15 de julio.

Les agradezco por adelantado su confirmación.

Sin otro particular, les saluda atentamente,

*José Otero*

folletos informativos

Les agradecería que reservaran...

*your leaflet giving details*

*I would like to book ...*

**Booking a room in a hotel**

Dear Sirs,

Thank you for your leaflet giving details about your hotel.

I would like to book two double rooms with bathroom at half-board from 2 to 15 July inclusive, one for my wife and myself with double bed, and one with twin beds for my two daughters.

I would be grateful if you could confirm this booking.

Yours sincerely,

*Tim Smith*

## Pedir información sobre un apartamento para las vacaciones

Distinguidos señores:

La Oficina de Turismo me ha enviado la lista y la descripción de los chalets y apartamentos que se alquilan para las vacaciones en su ciudad y en los alrededores.

Me interesaría particularmente el apartamento amueblado que ustedes me recomiendan. Desearía alquilarlo por un período de un mes a partir del 1 de julio. Quisiera, no obstante, antes de tomar la decisión, que me dieran alguna información más.

¿Podrían precisarme si los gastos suplementarios (de gas, electricidad u otros) están incluidos en el precio de alquiler y cuál sería la cantidad del depósito a pagar? ¿Disponen las camas de sábanas y mantas? Y, por último, ¿se admiten animales?

Esperando su respuesta y sin otro particular, les saluda atentamente,

*Juan Ibáñez*

la lista y la descripción de los chalets y apartamentos  
apartamento amueblado  
por un período de un mes a partir del 1 de julio  
¿Podrían precisarme si...?  
el precio de alquiler  
la cantidad del depósito  
¿Disponen las camas de sábanas y mantas?

*a detailed list of holiday lettings  
furnished apartment  
for one month from 1 July  
Could you tell me if ...  
the rent  
the deposit  
Is bedding provided?*

## Information about a holiday apartment

Dear Sir,

The tourist office has sent me details of holiday lettings in and around your town and I am particularly interested in your furnished apartment. I would like to rent it for one month from 1 July. However I should be grateful for some further details before making a final decision.

Could you tell me if bills (gas, electricity and any taxes) are included in the rent? What deposit do you require? Is bedding provided? And finally, are pets welcome?

Yours sincerely,

*John Roberts*

## Alquilar un apartamento para las vacaciones

Apreciados señores:

En primer lugar quisiera agradecerles su rápida respuesta.

Una vez obtenida la información adicional que han tenido la amabilidad de comunicarnos, les confirmo la decisión de alquilar el apartamento del 1 al 30 de julio, ambos incluidos.

Les adjunto un cheque de 200 euros en concepto de depósito. El resto del alquiler, es decir, 375 euros, les será entregado el día de nuestra llegada, el 1 de julio.

Sin otro particular, les saluda atentamente,

*Silvia Gómez*

P.S.: ¿Podrían precisarnos, por favor, dónde podemos recoger las llaves el día de nuestra llegada?

...que han tenido la amabilidad de comunicarnos  
 les confirmo la decisión de alquilar  
 en concepto de depósito  
 El resto del alquiler les será entregado...  
 ¿Podrían precisarnos, por favor, dónde...?

*... that you have kindly sent  
 I confirm that we have decided to rent  
 as a deposit  
 We will pay the balance ...  
 Kindly let us know where ...*

## Booking a holiday apartment

Dear Mr Hill,

Thank you for answering my letter so quickly.

I have read through the information and I can now confirm that we have decided to rent your apartment from 1 to 30 July inclusive.

I enclose a cheque for £150; and we will pay the balance of £700 on our arrival on 1 July.

Yours sincerely,

*Steven Roberts*

PS: Kindly let us know where to pick up the keys to the apartment on the day of our arrival.

## Carta desde el lugar de vacaciones

Querido Mario, querida Inés:

Un gran saludo desde la isla de Cuba donde desde hace una semana disfrutamos del sol y de las playas a la sombra de un cocotero. Hemos degustado ya todas las especialidades culinarias de la isla. ¿Y qué decir del delicioso ron de aquí? En una palabra: unas vacaciones de ensueño, y eso que el hotel, aunque confortable, es bastante ruidoso. Espero que los dos estéis bien y que no sufráis demasiado con el frío invernal de la capital.

Un abrazo muy fuerte,  
Juan y Christina

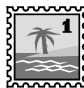

Familia Martínez  
c/Raiseñor 2A

08034 Barcelona

## Holiday postcard

Here we are in Barbados. There's plenty of sun, sand and palm trees. The beach suits me fine, but Peter keeps trying to tempt me off the beach to join him for some water-skiing. The hotel is good and the food is delicious, but the disco can be rather noisy if you want an early night! We have another week here before we head back home to a British winter. We hope that you're both well and we'll see you soon.

Love from

Maggie and Peter

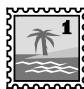

Gemma and John Roberts  
65 Rogers Road  
Rickland  
GN3 4BY

**Felicitación de Navidad (registro informal)**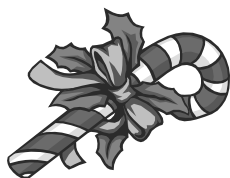

*Querido Pedro, querida María:  
Muchas gracias por vuestra felicitación  
de Navidad.*

*Igualmente queremos desearos una feliz  
Navidad y un próspero Año Nuevo y que  
el 2003 os traiga toda la felicidad del  
mundo.*

*Hasta pronto, en Madrid o en Cambrid-  
ge.*

*Besos,*

*Marga y David*

**Christmas Greetings (informal register)**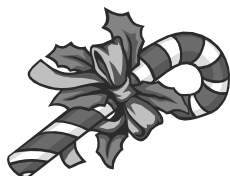

*Dear Julia and Robert,  
Wishing you both a very Merry Christ-  
mas and an excellent New Year, hoping  
that it brings you all the joy and suc-  
cess you wish for.*

*Hope to see you soon over here or back  
home in the States.*

*Love from*

*Maddie and Neil*
